# Supplementary material
Source: MDPI journal article supplement (https://www.mdpi.com/2073-4441/14/20/3244)
Supplement: s1 [file s1]

**Table S1.** Determination of the optimal quantity (S/L ration) of fly ash required for neutralization of the acid mine water samples to pH 7.

| FA Mass Fraction (%) | Mass (g) | Sample | Time (min) |      |      |      |      |      |      |       |
|----------------------|----------|--------|------------|------|------|------|------|------|------|-------|
|                      |          |        | 15         | 30   | 60   | 120  | 240  | 1440 | 5760 | 10080 |
| 3                    | 1.5      | EF     | 2.59       | 2.63 | 2.68 | 2.67 | 2.7  | 2.95 | 3.35 | 3.36  |
|                      |          | KOST   | 3.02       | 3.19 | 3.38 | 3.73 | 3.82 | 3.92 | 4.04 | 4.08  |
| 5                    | 2.5      | EF     | 2.88       | 3.16 | 3.6  | 3.71 | 3.71 | 3.96 | 4.04 | 4.07  |
|                      |          | KOST   | 3.37       | 3.86 | 4.05 | 4.12 | 4.16 | 4.07 | 4.16 | 4.21  |
| 10                   | 5        | EF     | 3.69       | 4.04 | 3.92 | 3.94 | 3.97 | 4.11 | 4.27 | 4.31  |
|                      |          | KOST   | 4.37       | 4.32 | 4.41 | 4.47 | 4.47 | 4.47 | 4.83 | 5.02  |
| 15                   | 7.5      | EF     | 4.11       | 4.06 | 4.15 | 4.22 | 4.29 | 4.48 | 4.64 | 4.86  |
|                      |          | KOST   | 4.6        | 4.71 | 4.92 | 5.15 | 5.41 | 5.68 | 6.34 | 6.59  |
| 20                   | 10       | EF     | 4.18       | 4.3  | 4.26 | 4.54 | 4.83 | 5.51 | 6.32 | 6.3   |
|                      |          | KOST   | 5.49       | 5.91 | 6.21 | 6.54 | 6.64 | 7.07 | 7.5  | 7.44  |
| 25                   | 12.5     | EF     | 4.38       | 4.58 | 4.9  | 5.54 | 5.98 | 6.26 | 6.85 | 7.16  |
|                      |          | KOST   | 5.72       | 6.22 | 6.55 | 6.75 | 6.97 | 6.96 | 7.86 | /     |
| 30                   | 15       | EF     | 4.43       | 4.74 | 5.57 | 6.03 | 6.48 | 6.69 | 7.5  | 7.68  |
|                      |          | KOST   | 6.13       | 6.53 | 6.81 | 7.05 | 7.23 | 7.36 | 7.64 | 7.8   |
| 40                   | 20       | EF     | 5.24       | 6.58 | 7.67 | 7.96 | 8.28 | 8.1  | 8.34 | 8.37  |
|                      |          | KOST   | 6.2        | 6.48 | 6.81 | 7.03 | 7.3  | 7.42 | 8.01 | 8.01  |

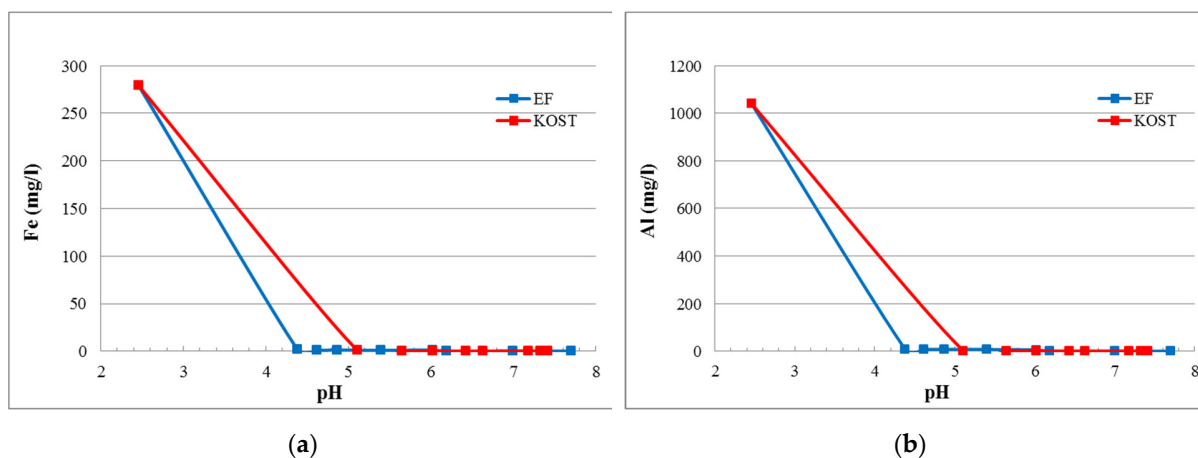

**Figure S1.** Dependence of the Fe and Al concentration in solution on pH values during the AMD treatment.

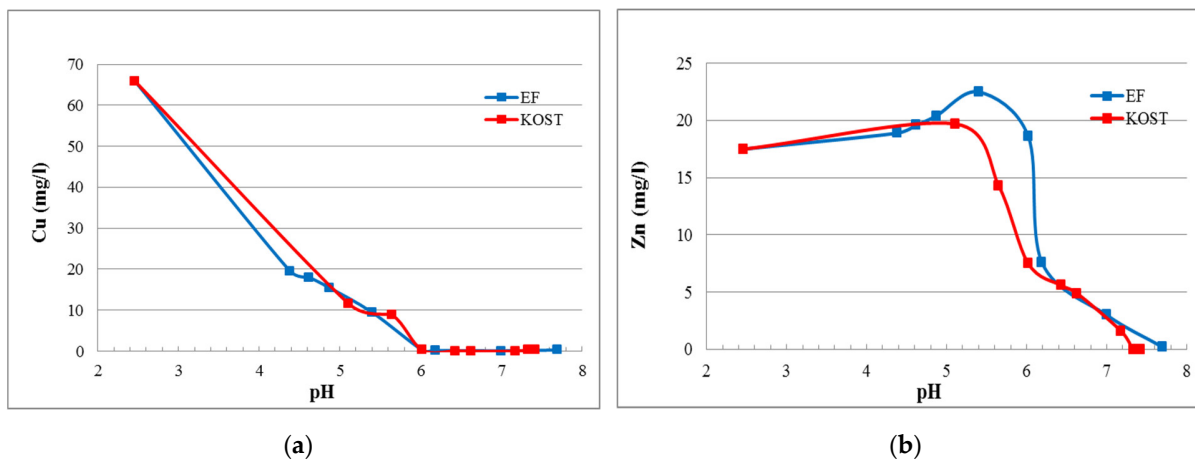

**Figure S2.** Dependence of Cu and Zn concentration in solution on pH values during the AMD treatment.

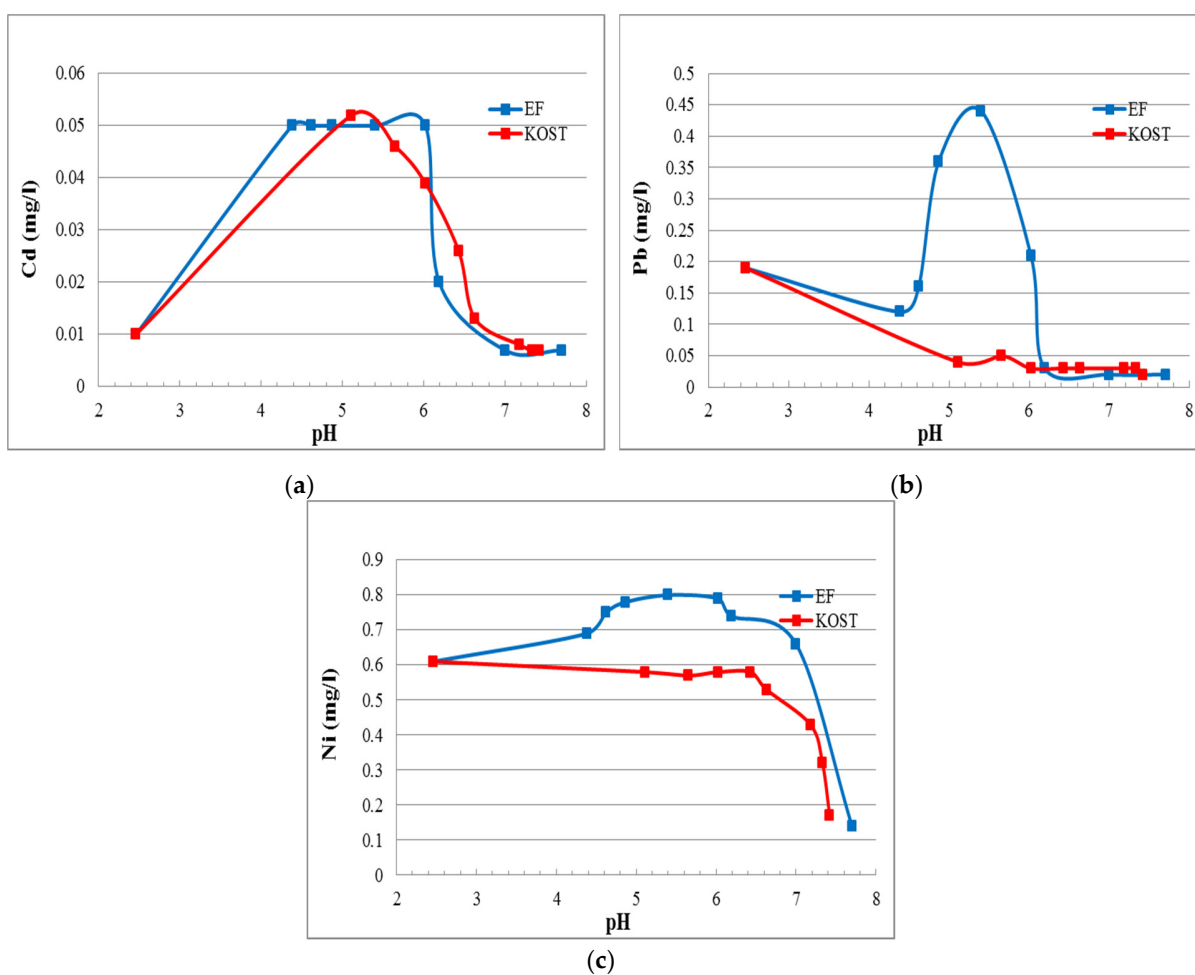

**Figure S3.** Dependence of Ni, Pb and Cd concentration in solution on pH values during the AMD treatment.
